# Supplementary material
Source: publisher site journal article supplement (https://www.dovepress.com/article/239772)
Supplement: Supplementary file 1 [file get_supplementary_file.php]

| Reference Number | Article First Author | Technology | With phaco? | Quality Point Total | Clinical  Trials.gov  Registration | Control | Masking | Follow-up | Funding | Conflicts |
| --- | --- | --- | --- | --- | --- | --- | --- | --- | --- | --- |
| 19 | Quaranta | ab interno gonio trabeculotomy | no | 5 | 0 | 1 | 0 | 2 | 1 | 1 |
| 20 | Ferrari | ab interno trabeculectomy (with vitrectomy forceps) | yes | 3 | 0 | -1 | 0 | 2 | 1 | 1 |
| 32 | Hoeh | Cypass | yes | -1 | 0 | -1 | 0 | 0 | 0 | 0 |
| 33 | Garcia-Feijoo | Cypass | no | 1 | 1 | -1 | 0 | 1 | 0 | 0 |
| 34 | Hoeh | Cypass | yes | 1 | 1 | -1 | 0 | 1 | 0 | 0 |
| 35 | Hoh | Cypass | yes | 1 | 0 | -1 | 0 | 2 | 0 | 0 |
| 36 | Vold | Cypass | yes | 5 | 1 | 1 | 1 | 2 | 0 | 0 |
| 7 | Murthy | ECP | no | 2 | 0 | -1 | 0 | 1 | 1 | 1 |
| 8 | Francis | ECP | no | 3 | 0 | -1 | 0 | 2 | 1 | 1 |
| 9 | Francis | ECP | yes | 3 | 0 | 1 | 0 | 2 |  | 0 |
| 10 | Lima | ECP | no | 4 | 0 | 1 | 0 | 1 | 1 | 1 |
| 11 | Gayton | ECP | yes | 5 | 0 | 1 | 0 | 2 | 1 | 1 |
| 21 | Jacobi | endoscopic trabecular surgery | no | 2 | 0 | -1 | 0 | 1 | 1 | 1 |
| 16 | Feltgen | Er:YAG gonio puncture | yes | 3 | 0 | 0 | 0 | 1 | 1 | 1 |
| 17 | Feltgen | Er:YAG gonio puncture | yes | 4 | 0 | 0 | 0 | 2 | 1 | 1 |
| 18 | Philippin | Er:YAG goniotomy | yes | 2 | 0 | 0 | 0 | 2 |  |  |
| 26 | Toteberg-Harms | Excimer Laser Trabeculotomy (ELT) | yes | 2 | 1 | -1 | 0 | 1 |  | 1 |
| 15 | Giannaccare | HIFU (high intensity focused ultrasound) | no | 0 | 0 | -1 | 0 | -1 | 1 | 1 |
| 29 | Fea | Hydrus | no | 4 | 1 | 1 | 0 | 1 | 1 | 0 |
| 30 | Pfeiffer | Hydrus | yes | 5 | 1 | 1 | 1 | 2 | 0 | 0 |
| 31 | Samuelson | Hydrus | yes | 6 | 1 | 1 | 2 | 2 | 0 | 0 |
| 22 | Jacobi | i/a of TM | mixed | 4 | 0 | 0 | 0 | 2 | 1 | 1 |
| 24 | Kessing | IDK (intrastromal diathermal keratostomy) | no | 1 | 0 | -1 | 0 | 0 | 1 | 1 |
| 25 | Bach-Holm | IDK (intrastromal diathermal keratostomy) | no | 3 | 0 | 0 | 0 | 1 | 1 | 1 |
| 37 | Spiegel | iStent | yes | -1 | 0 | -1 | 0 | 0 | 0 | 0 |
| 38 | Spiegel | iStent | mixed | 0 | 0 | -1 | 0 | 1 | 0 | 0 |
| 39 | Ahmed | istent | no | 0 | 0 | -1 | 0 | 1 | 0 | 0 |
| 40 | Shiba | iStent | no | 0 | *Japanese registration | -1 | 0 | 0 | 0 | 1 |
| 41 | Arriola-Villalobos | iStent | yes | 0 | 0 | -1 | 0 | 1 | 0 | 0 |
| 42 | Spiegel | iStent | yes | 0 | 0 | -1 | 0 | 1 | 0 | 0 |
| 43 | Vandewalle | iStent | yes | 0 | 0 | -1 | 0 | 1 |  |  |
| 44 | Patel | iStent | mixed | 1 | 0 | -1 | 0 | 0 | 1 | 1 |
| 45 | Lindstrom | iStent | no | 1 | 1 | -1 | 0 | 1 | 0 | 0 |
| 46 | Katz | iStent | no | 1 | 1 | -1 | 0 | 1 | 0 | 0 |
| 47 | Berdahl | istent | no | 1 | 1 | -1 | 0 | 1 | 0 | 0 |
| 48 | Arriola-Villalobos | iStent | yes | 1 | 0 | -1 | 0 | 2 | 0 | 0 |
| 49 | Belovay | iStent | yes | 1 | 0 | -1 | 0 | 1 | 1 | 0 |
| 50 | Donnenfield | iStent | no | 2 | 1 | -1 | 0 | 2 | 0 | 0 |
| 51 | Katz | iStent | no | 2 | 1 | -1 | 0 | 2 | 0 | 0 |
| 52 | Chang | istent | no | 2 | 1 | -1 | 0 | 2 | 0 | 0 |
| 53 | Buchacra | iStent | no | 2 | 0 | -1 | 0 | 1 | 1 | 1 |
| 54 | Neuhann | iStent | yes | 2 | 0 | -1 | 0 | 2 | 0 | 1 |
| 55 | Samuelson | iStent | yes | 3 | 1 | 1 | 0 | 1 | 0 | 0 |
| 56 | Craven | iStent | yes | 3 | 0 | 1 | 0 | 2 | 0 | 0 |
| 57 | Tan | iStent | yes | 3 | 0 | -1 | 0 | 2 | 1 | 1 |
| 58 | Vold | iStent | no | 4 | 1 | 1 | 0 | 2 | 0 | 0 |
| 58 | Fernandez-Barrientos | istent | yes | 4 | 1 | 1 | 1 | 1 | 0 | 0 |
| 60 | Fea | iStent | yes | 5 | 0 | 1 | 2 | 1 | 0 | 1 |
| 61 | Fea | istent | yes | 5 | 1 | 1 | 0 | 2 |  | 1 |
| 62 | Voskanyan | iStent inject | mixed | 1 | 1 | -1 | 0 | 1 | 0 | 0 |
| 63 | Arriola-Villalobos | iStent inject | yes | 1 | 0 | -1 | 0 | 2 | 0 | 0 |
| 64 | Fea | iStent inject | no | 2 | 0 | 1 | 0 | 1 | 0 | 0 |
| 65 | Myers | iStent+Supra | no | 2 | 1 | -1 | 0 | 2 | 0 | 0 |
| 27 | Greenwood | KDB | yes | -1 | 0 | -1 | 0 | 0 | 0 | 0 |
| 28 | Dorairaj | KDB | yes | 0 | 0 | -1 | 0 | 1 | 0 | 0 |
| 12 | Tan | Micropulse | no | 2 | 0 | -1 | 0 | 1 | 1 | 1 |
| 13 | Aquino | Micropulse | no | 6 | 1 | 1 | 1 | 1 | 1 | 1 |
| 6 | Pahlitzsch | MIGS/QoL | unknown | 2 | 0 | 0 | 0 | 0 | 1 | 1 |
| 23 | Sato | suture trab 360 | no | 0 | 0 | -1 | 0 | 0 |  | 1 |
| 66 | Minckler | Trabectome | no | -1 | 0 | -1 | 0 | 0 | 0 | 0 |
| 67 | Minckler | Trabectome | no | -1 | 0 | -1 | 0 | 0 |  |  |
| 68 | Bussel | Trabectome | mixed | 0 | 0 | -1 | 0 | 1 | 0 | 0 |
| 69 | Bussel | Trabectome | mixed | 0 | 0 | -1 | 0 | 1 | 0 | 0 |
| 70 | Akil | Trabectome | mixed | 0 | 0 | -1 | 0 | 1 | 0 | 0 |
| 71 | Okeke | Trabectome | mixed | 0 | 0 | -1 | 0 | 1 | 0 | 0 |
| 72 | Nazarali | Trabectome | mixed | 0 | 0 | -1 | 0 | 1 | 0 | 0 |
| 73 | Tojo | Trabectome | mixed | 0 | 0 | -1 | 0 | -1 | 1 | 1 |
| 74 | Arora | Trabectome | no | 0 | 0 | -1 | 0 | 1 | 0 | 0 |
| 75 | Lee | Trabectome | no | 0 | 0 | -1 | 0 | 0 | 0 | 1 |
| 76 | Maeda | Trabectome | no | 0 | 0 | -1 | 0 | 0 |  | 1 |
| 77 | Francis | Trabectome | yes | 0 | 0 | -1 | 0 | 1 | 0 | 0 |
| 78 | Ting | Trabectome | mixed | 1 | 0 | -1 | 0 | 1 | 0 | 1 |
| 79 | Jordan | Trabectome | mixed | 2 | 0 | -1 | 0 | 2 |  | 1 |
| 80 | Mizoguchi | Trabectome | no | 3 | 0 | -1 | 0 | 2 | 1 | 1 |
| 81 | Kinoshita-Nakano | Trabectome | mixed | 4 | *Japanese registration | 0 | 0 | 2 | 1 | 1 |
| 14 | Aptel | ultrasonic circular cyclocoagulation (UC3) | no | 0 | 0 | -1 | 0 | 1 | 0 | 0 |
| 82 | Rezkallah | Xen | no | -1 | 0 | -1 | 0 | -1 | 1 | 0 |
| 83 | Grover | Xen | no | 0 | 0 | -1 | 0 | 1 | 0 | 0 |
| 84 | Sheybani | Xen | no | 0 | 0 | -1 | 0 | 1 | 0 | 0 |
| 85 | Sheybani | Xen | yes | 0 | 0 | -1 | 0 | 1 | 0 | 0 |
| 86 | Perez-Torregrosa | Xen | yes | 0 | 0 | -1 | 0 | 1 |  |  |
| 87 | Olate-Perez | xen | yes | 0 | 0 | -1 | 0 | 1 |  |  |
| 88 | Mansouri | Xen | mixed | 1 | 0 | -1 | 0 | 1 | 1 | 0 |
| 89 | Monsouri | Xen | mixed | 1 | 0 | -1 | 0 | 1 | 1 | 0 |
| 90 | Galal | Xen | mixed | 1 | 0 | -1 | 0 | 1 |  | 1 |
| 91 | Sng | Xen | no | 1 | 0 | -1 | 0 | 1 | 1 | 0 |
| 92 | De Gregorio | Xen | yes | 1 | 0 | -1 | 0 | 1 |  | 1 |
